# Supplementary material for: The E3 ubiquitin ligase Nedd4L preserves skeletal muscle stem cell quiescence by inhibiting their activation
Source: PubMed Central journal article supplement (PMC11250905; doi:10.1016/j.isci.2024.110241), 2024-06-11
Supplement: mmc1.pdf [file mmc1.pdf]

**Supplemental information**

**The E3 ubiquitin ligase Nedd4L preserves  
skeletal muscle stem cell quiescence  
by inhibiting their activation**

**Darren M. Blackburn, Korin Sahinyan, Aldo Hernández-Corchado, Felicia Lazure, Vincent Richard, Laura Raco, Gabrielle Perron, René P. Zahedi, Christoph H. Borchers, Christoph Lepper, Hiroshi Kawabe, Arezu Jahani-Asl, Hamed S. Najafabadi, and Vahab D. Soleimani**

Figure S1

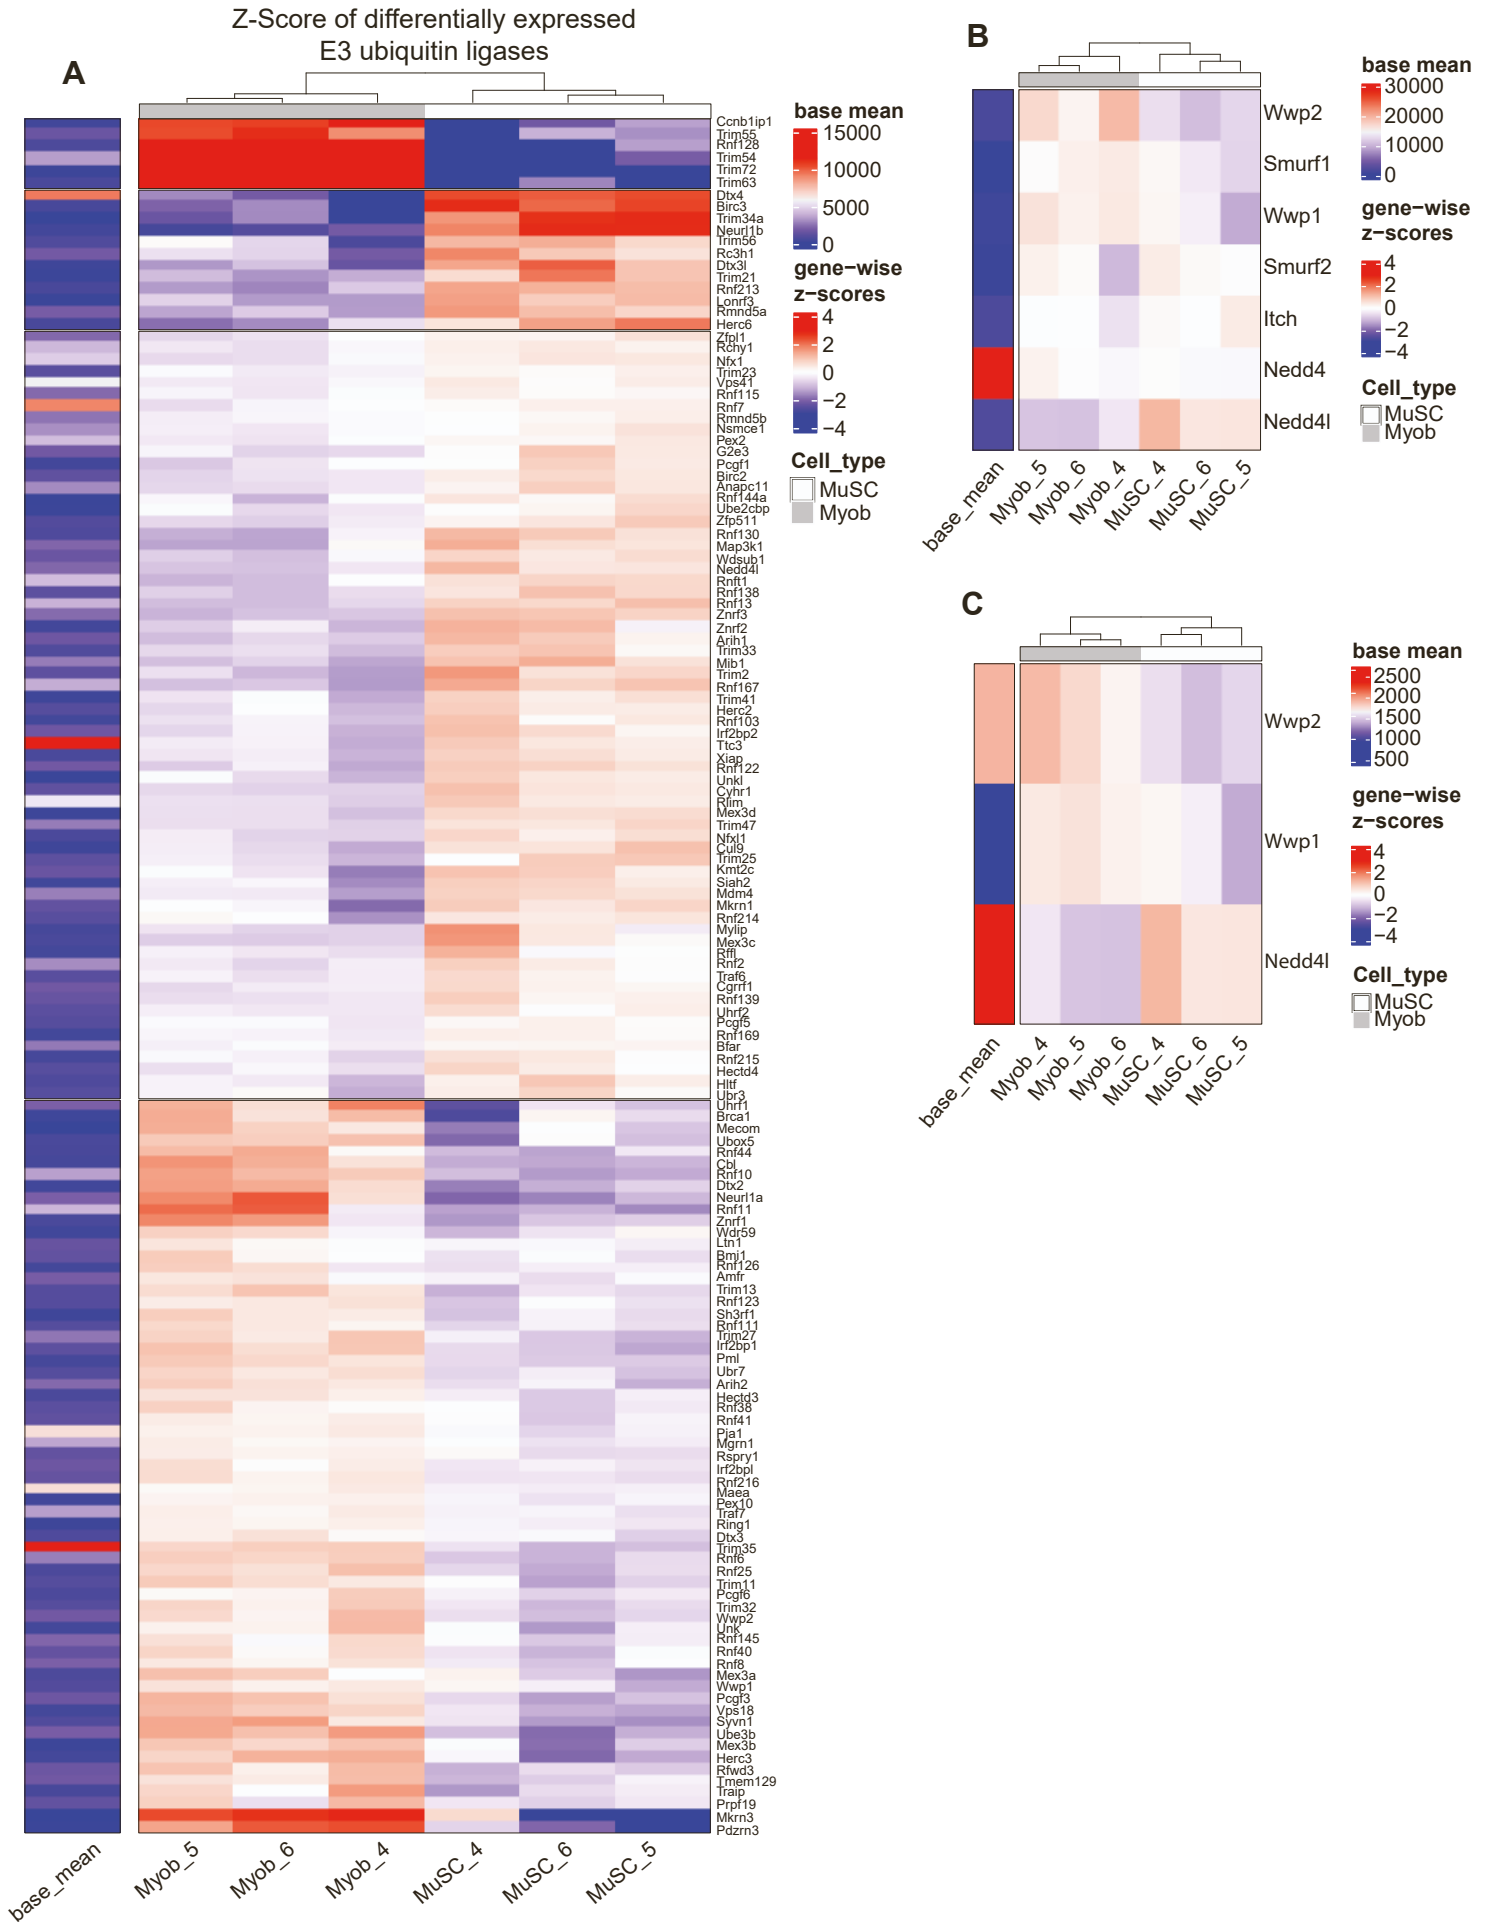

Figure S2

A

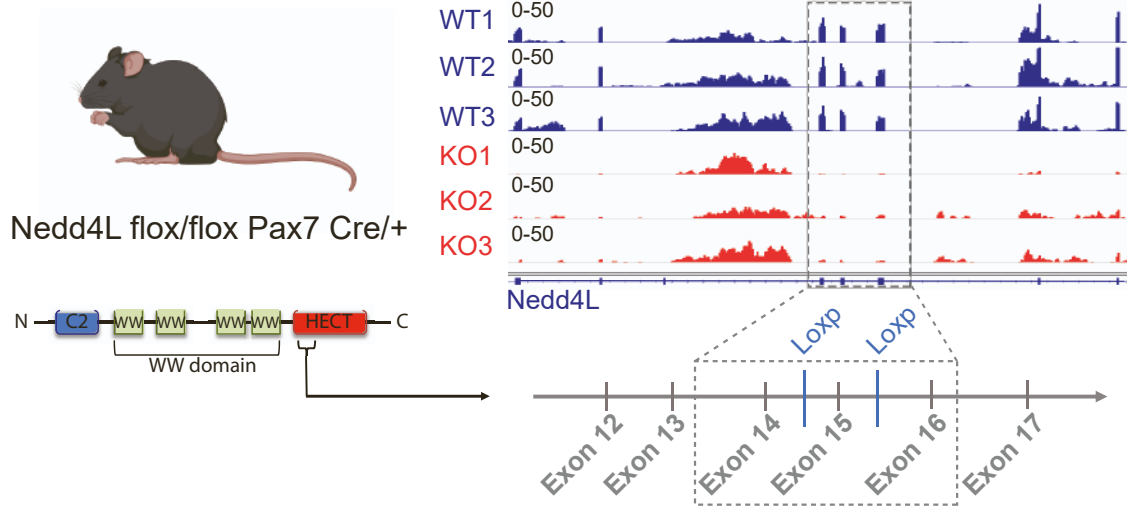

B

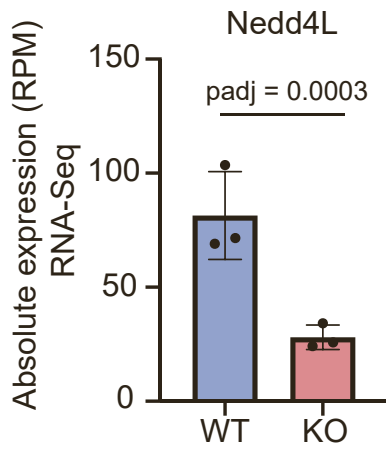

C Top 100 Differentially Expressed Genes

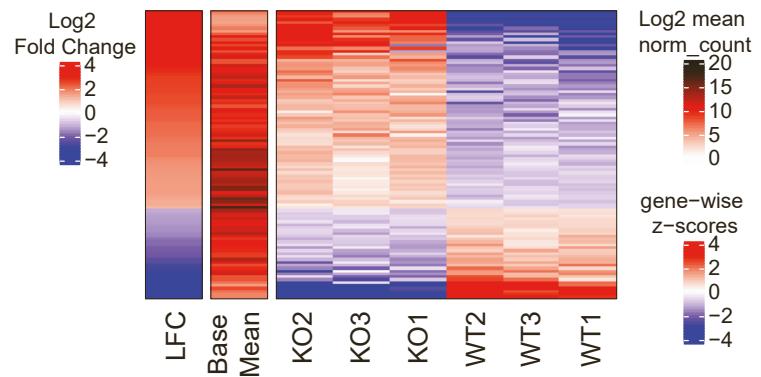

D

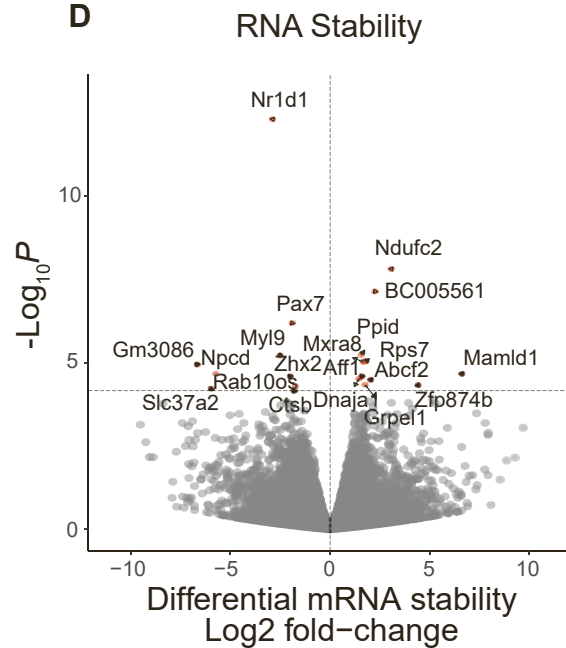

Figure S3

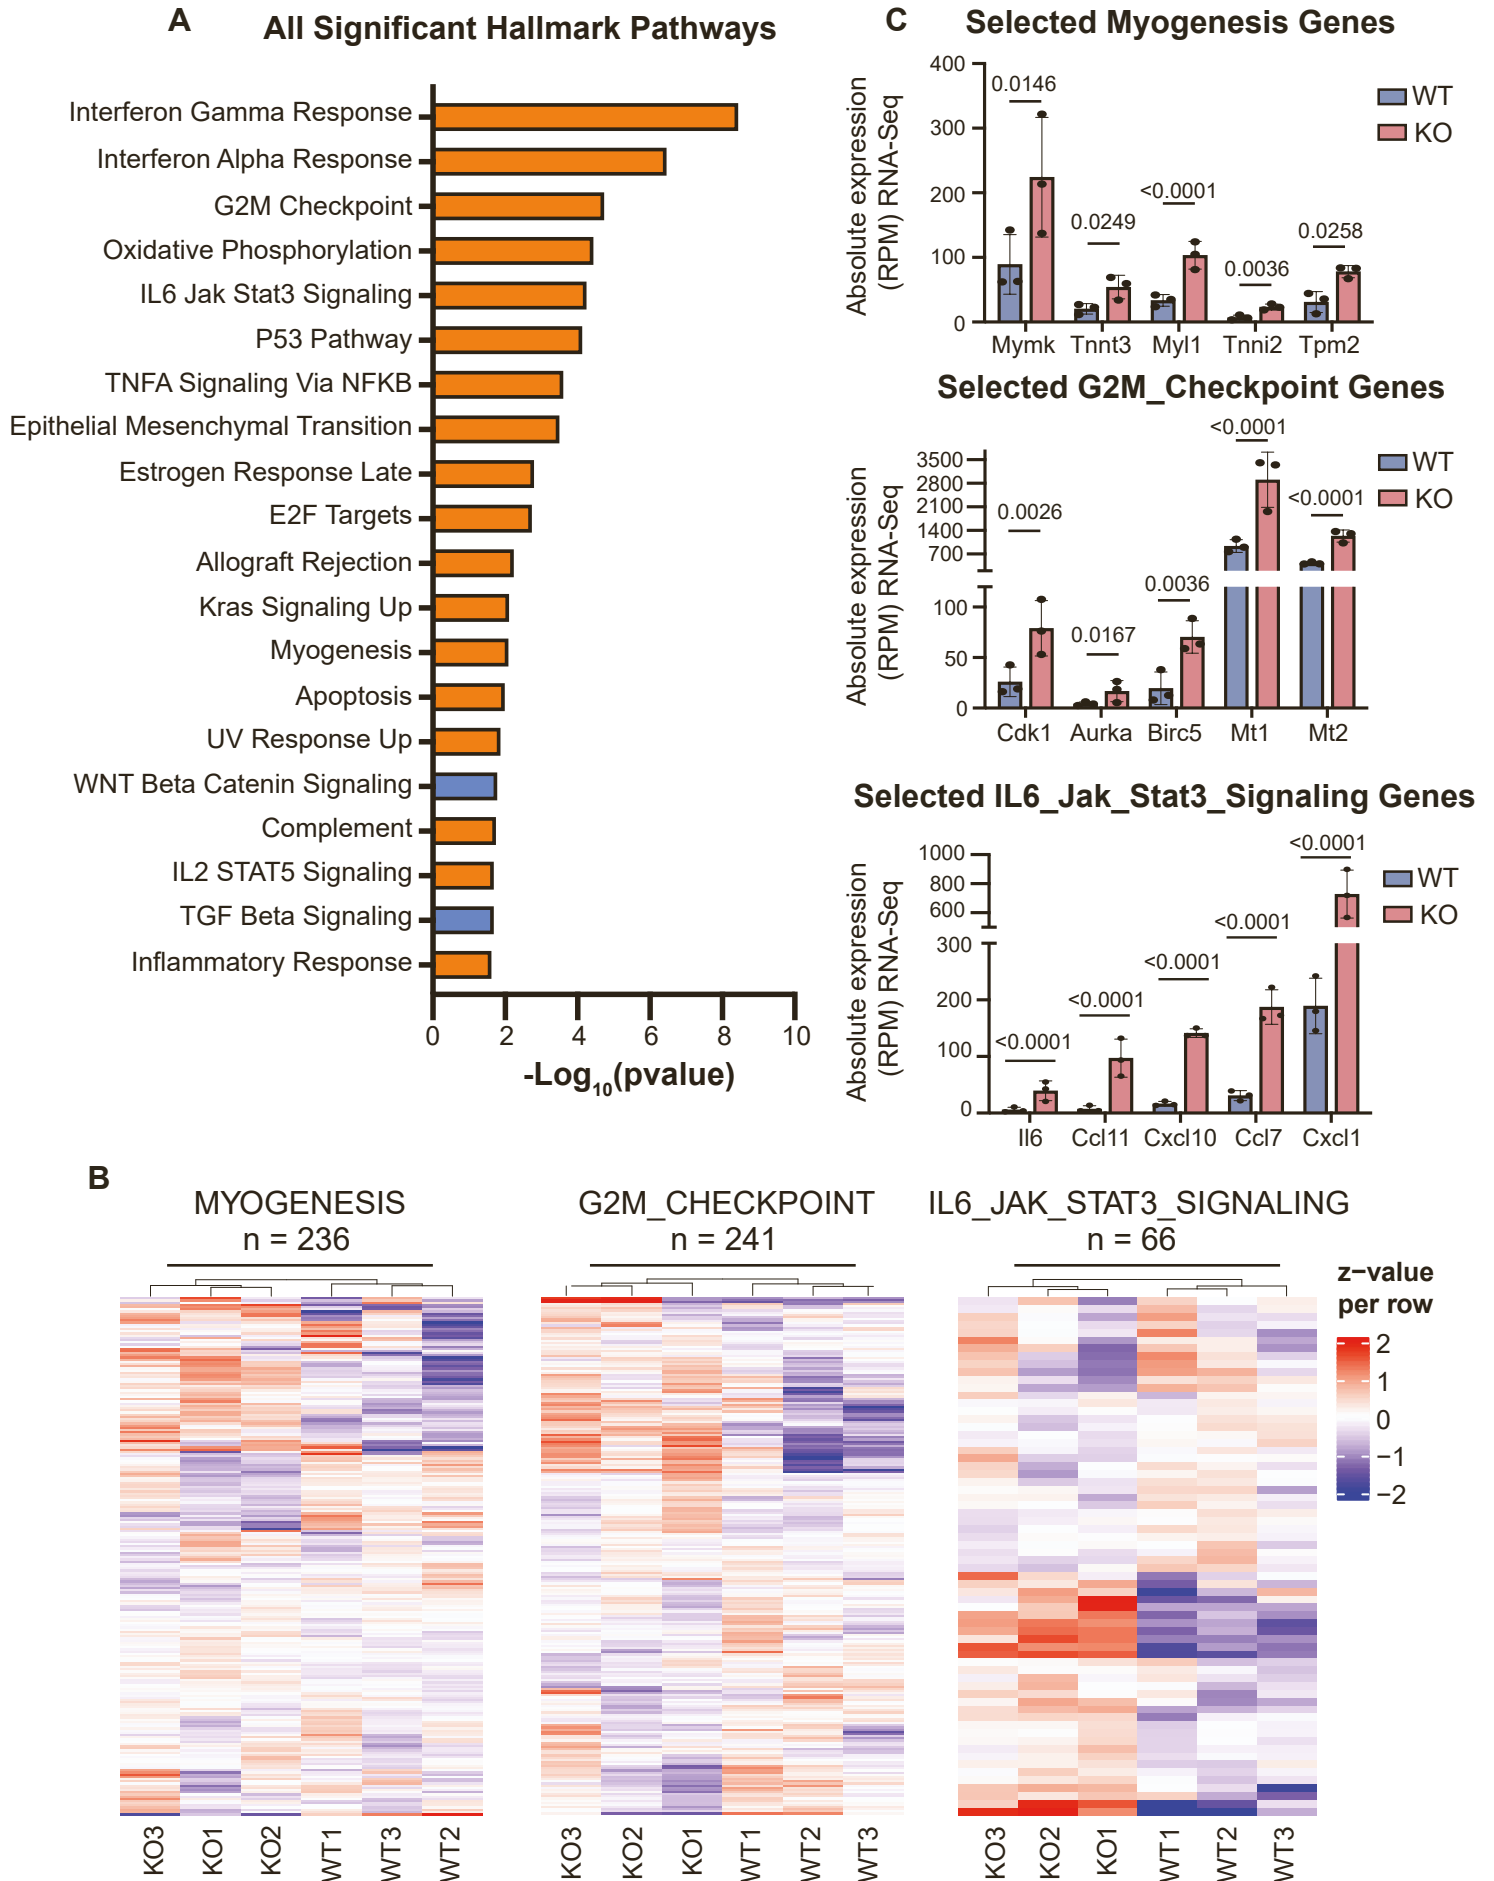

Figure S4

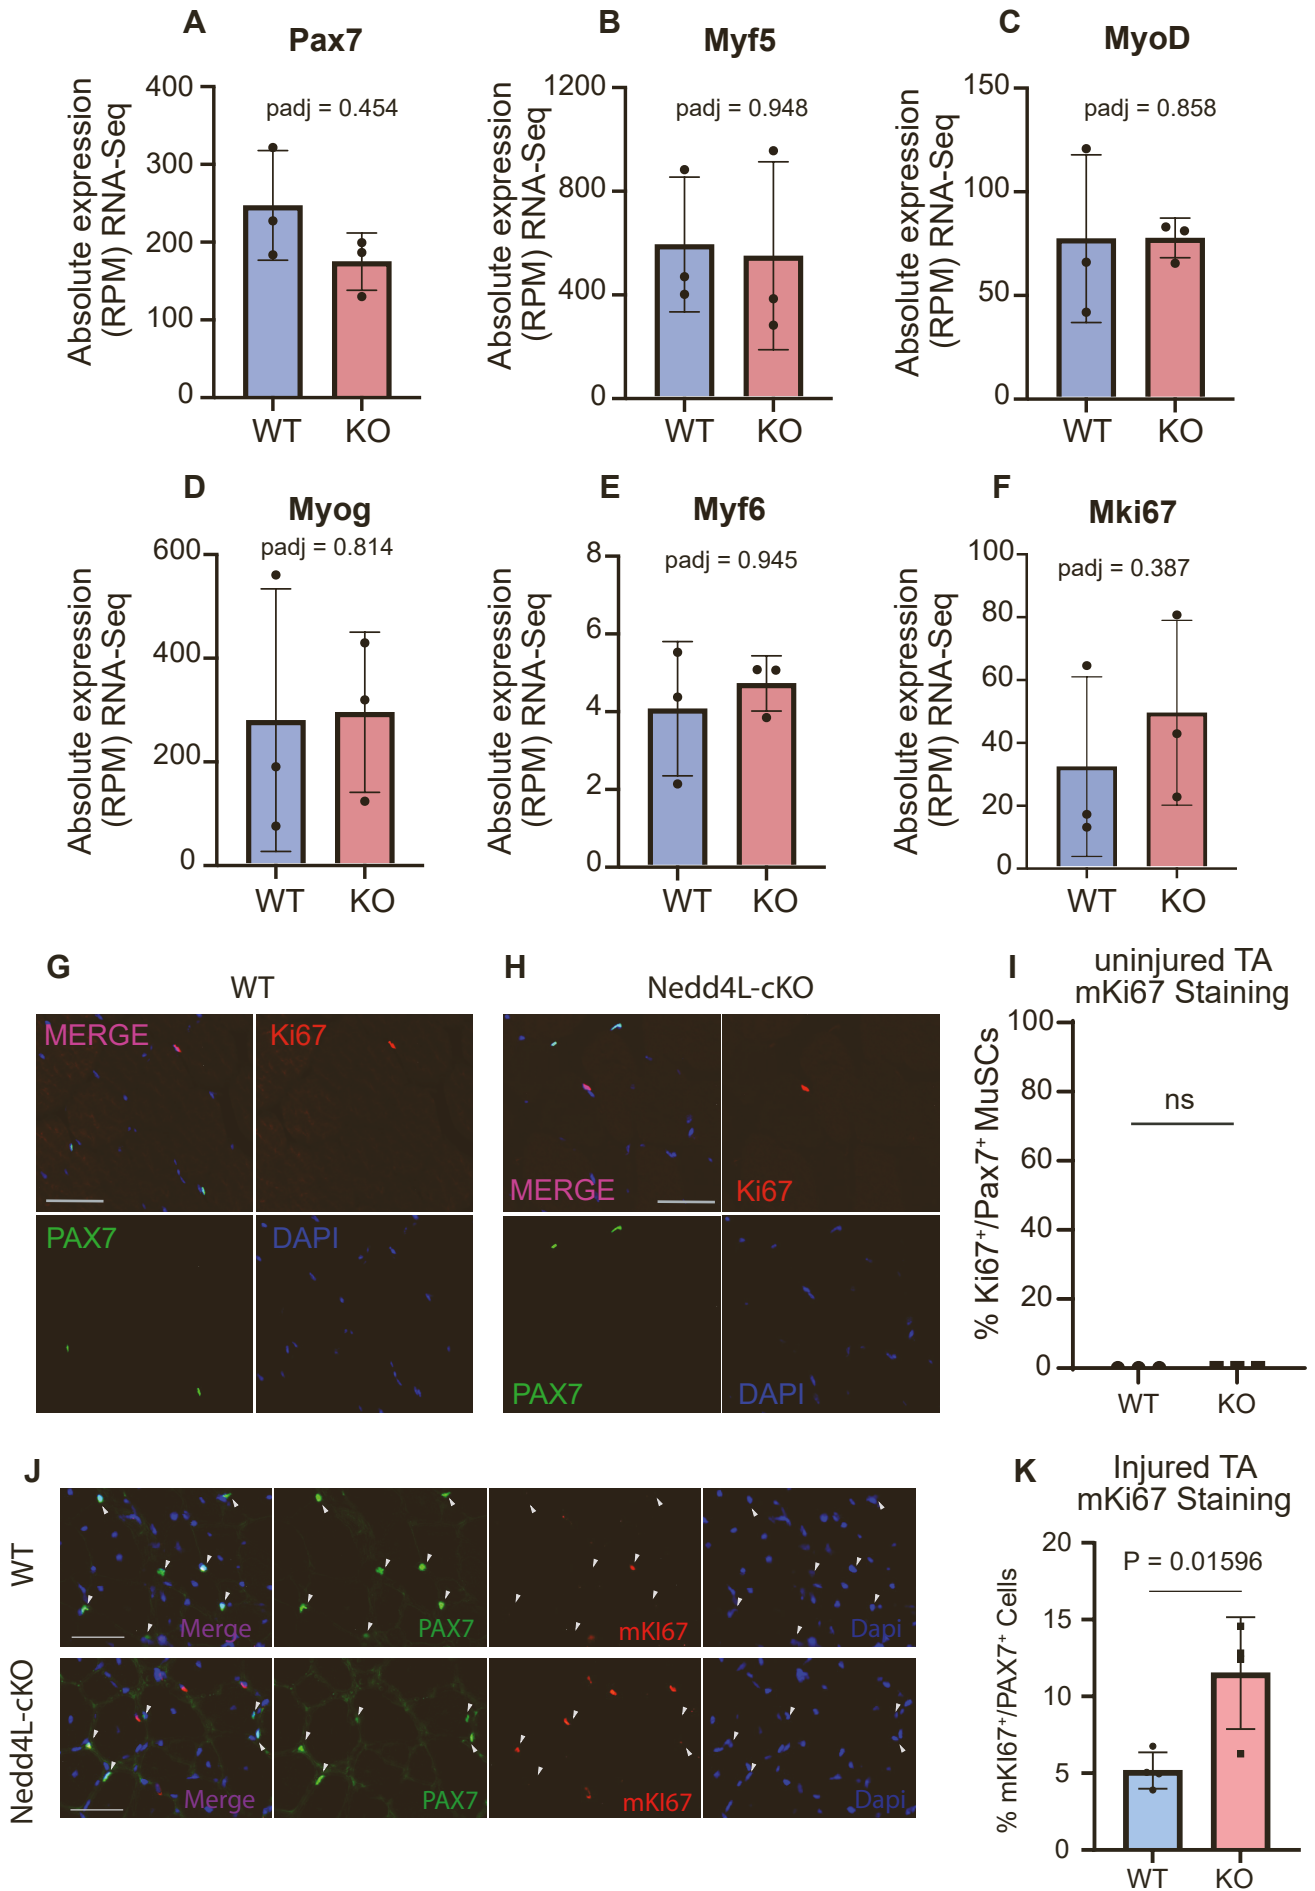

**Figure S5**

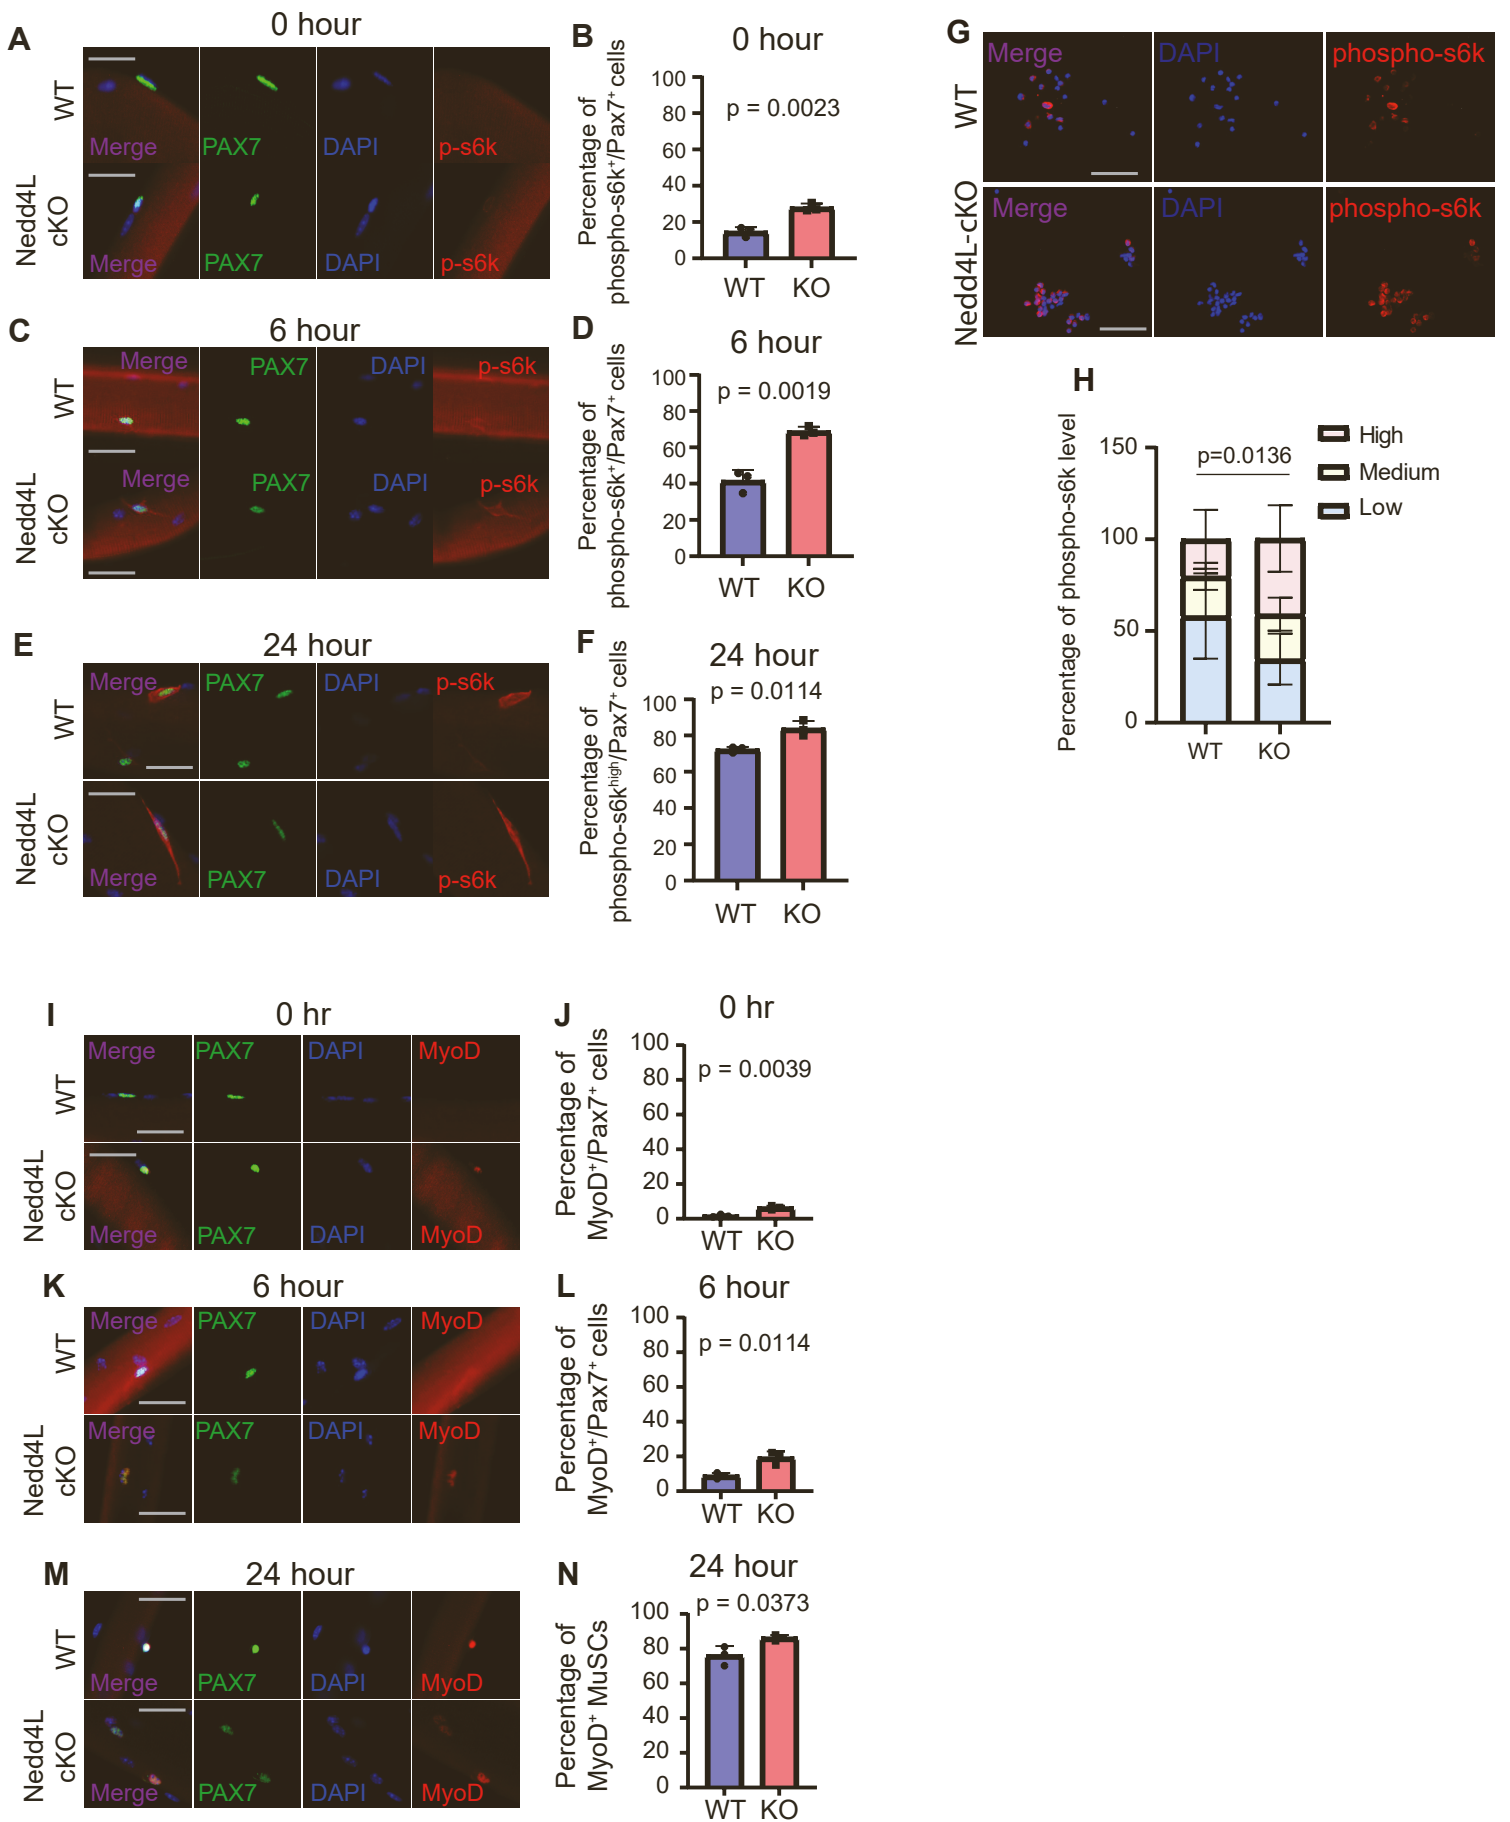

Figure S6

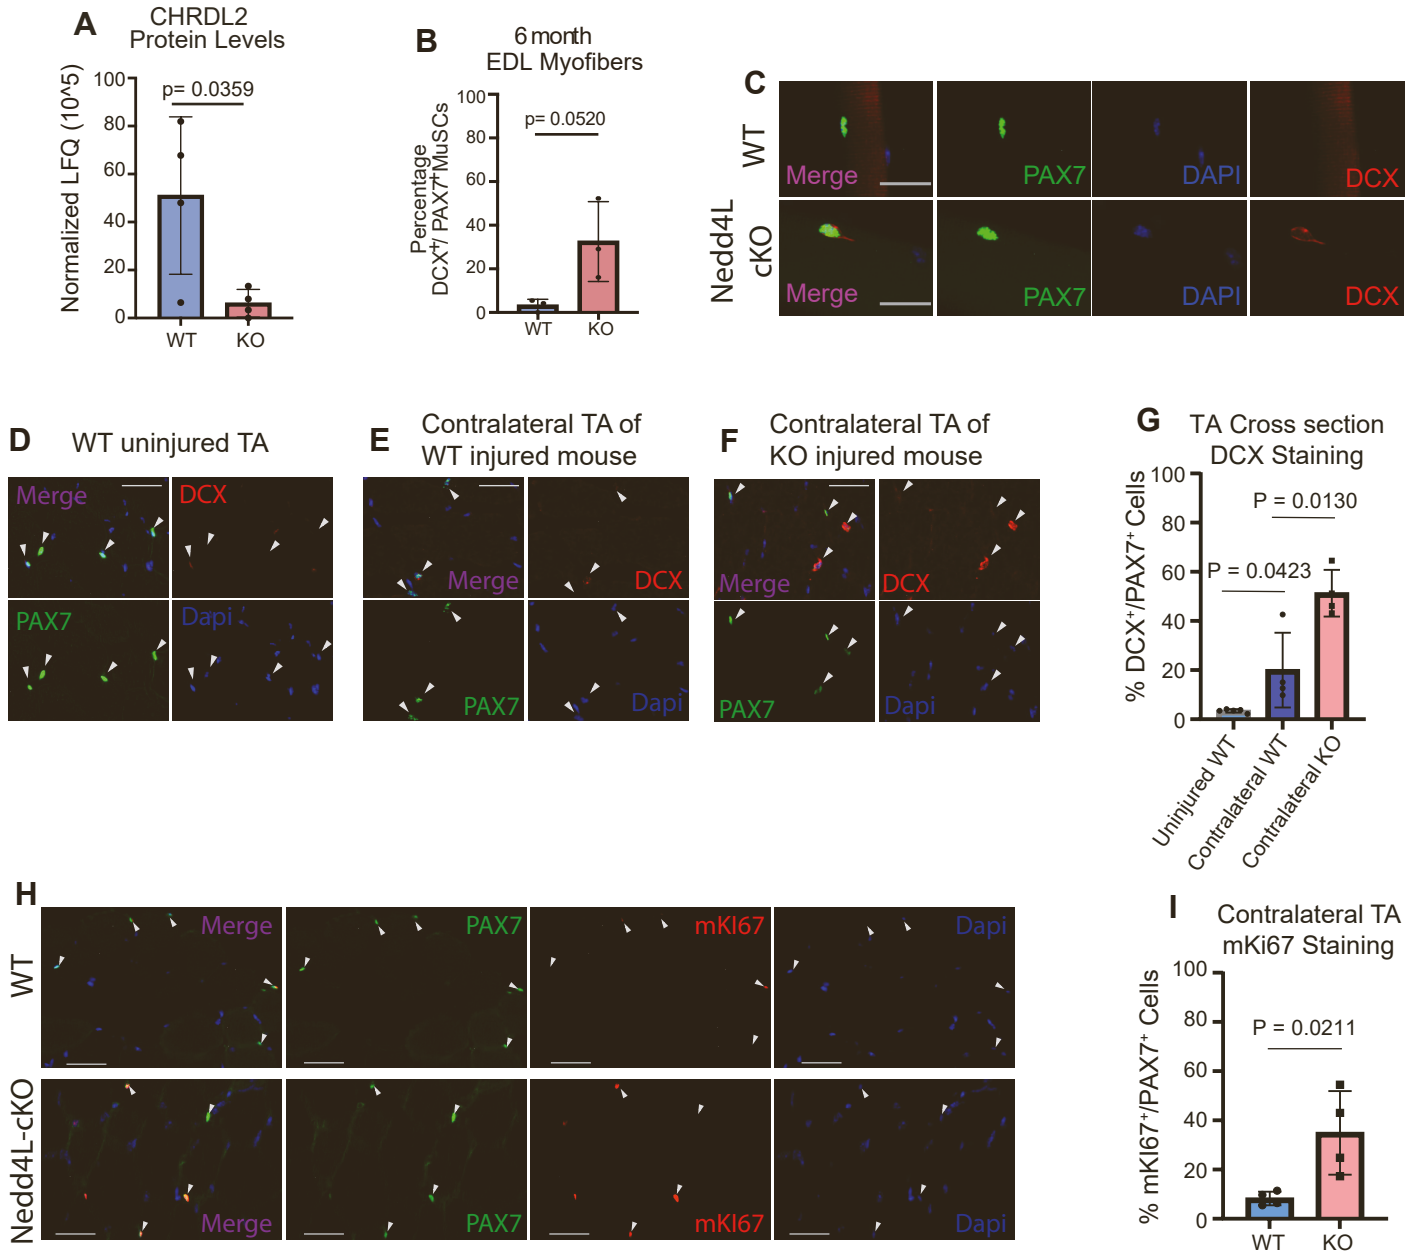

Figure S7

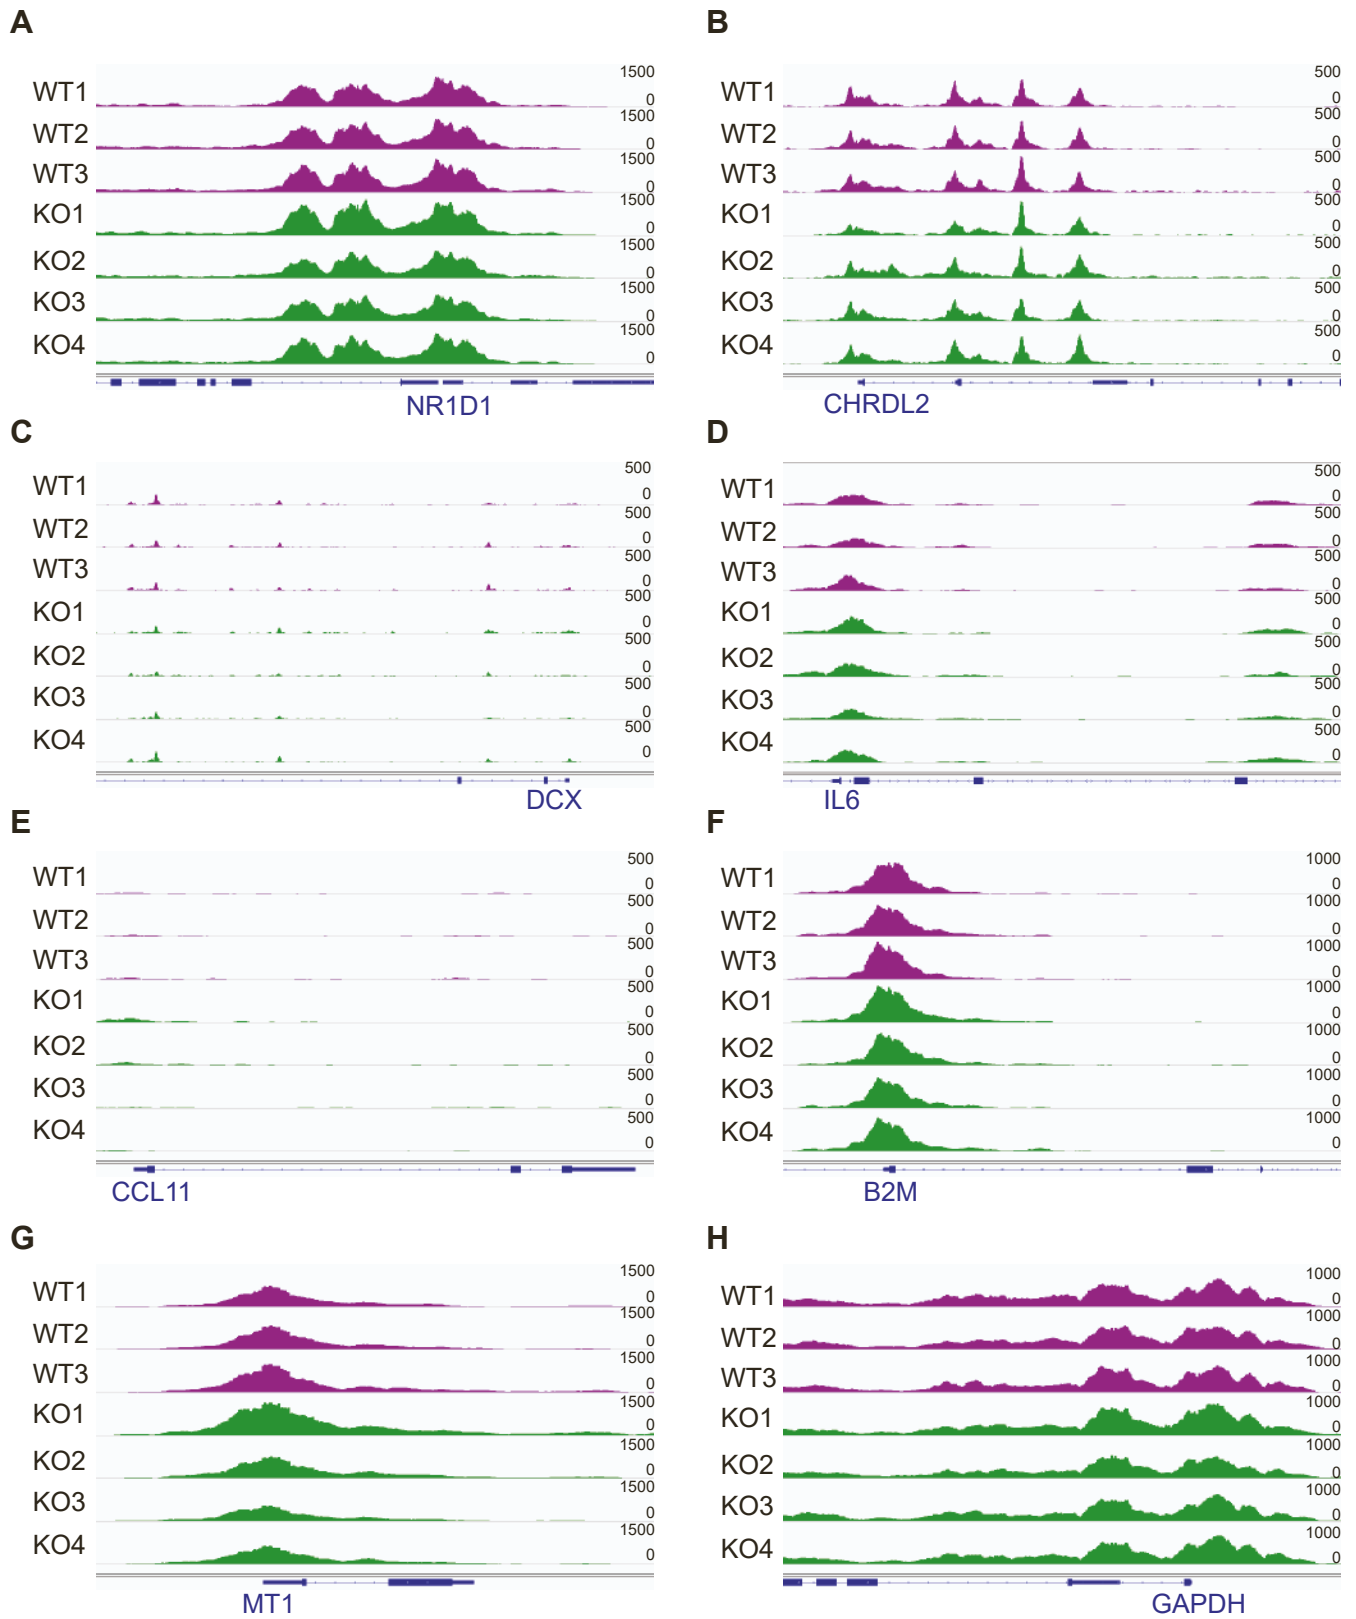



**Figure S8**

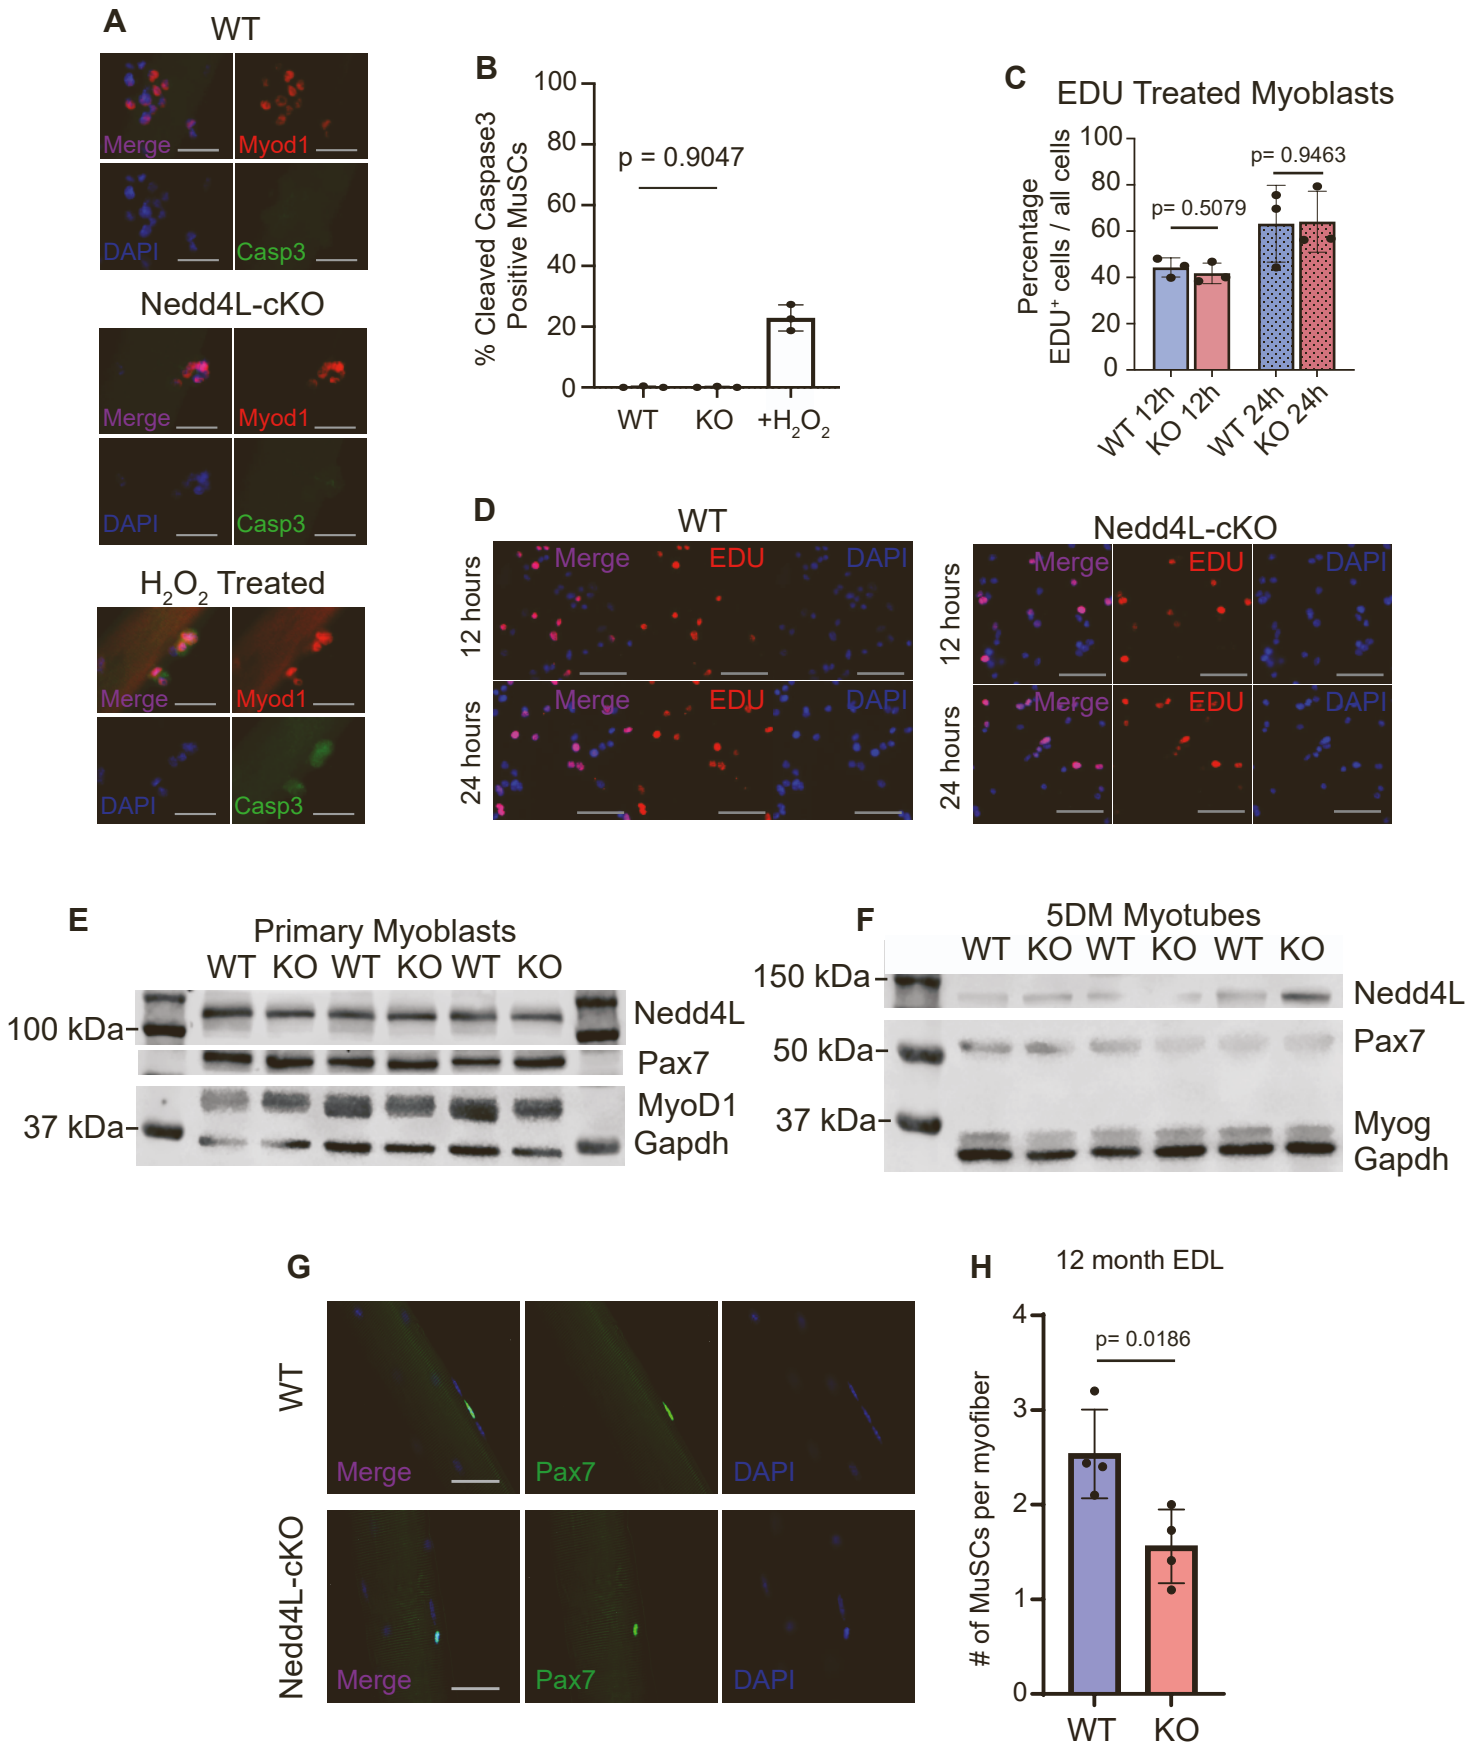

**Figure S9**

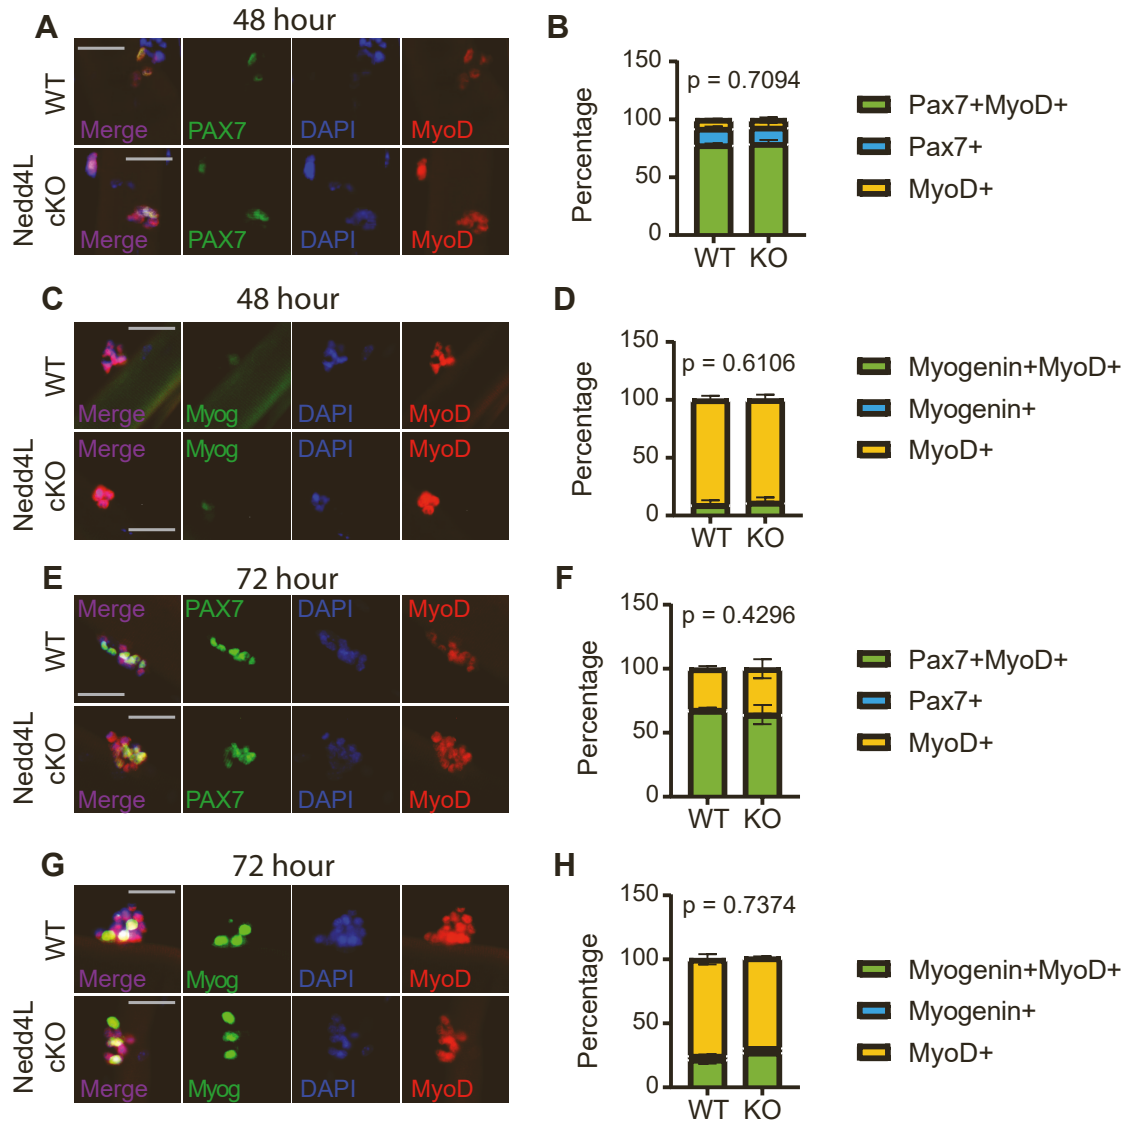

Figure S10

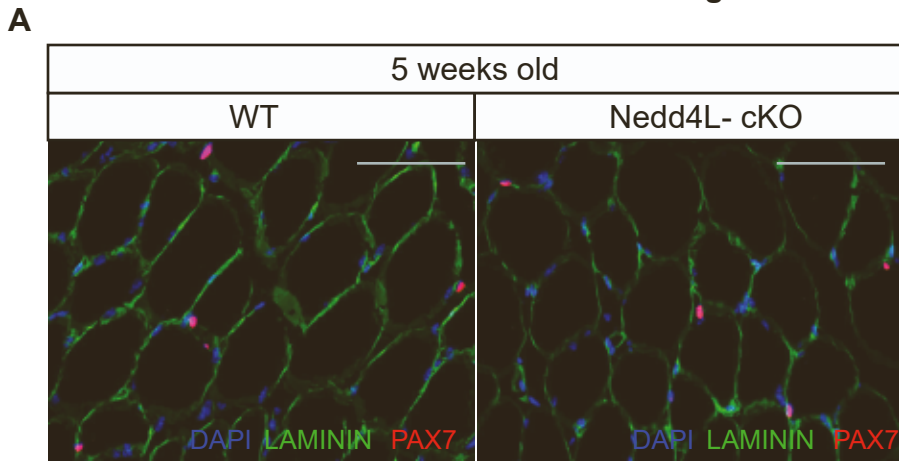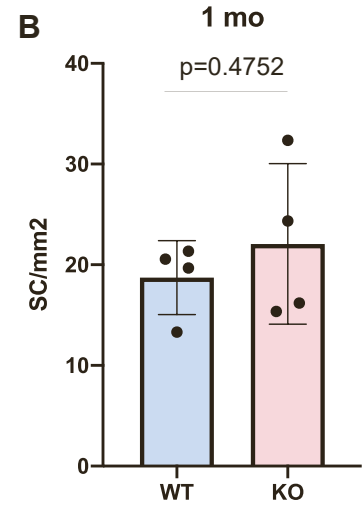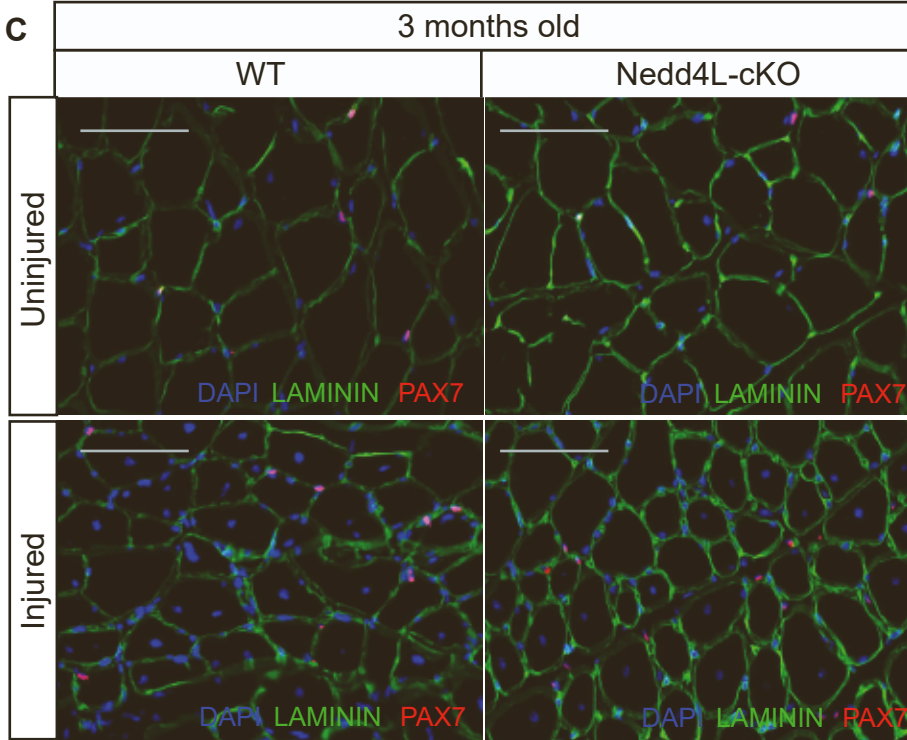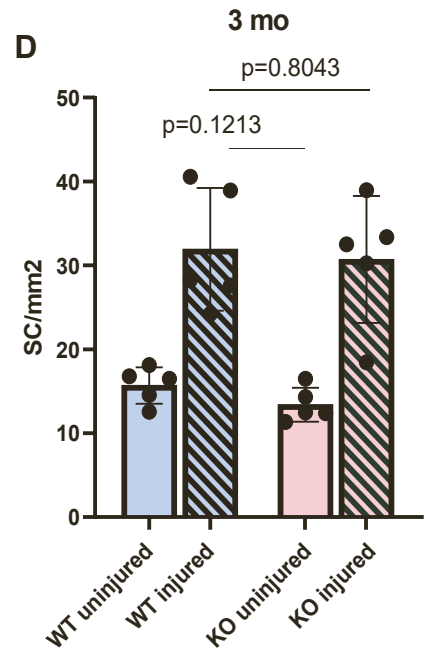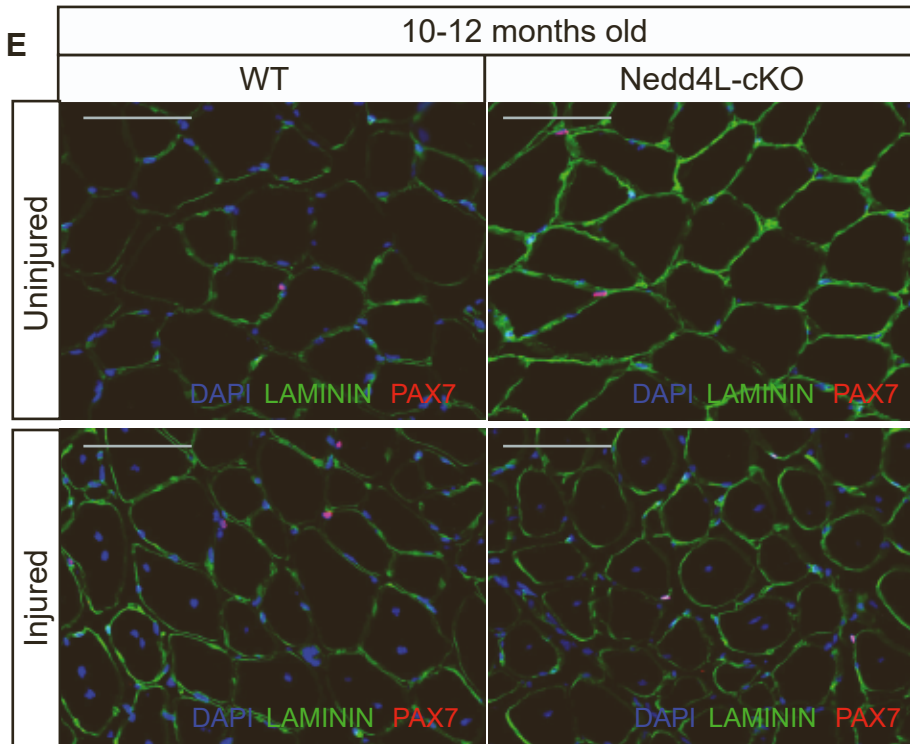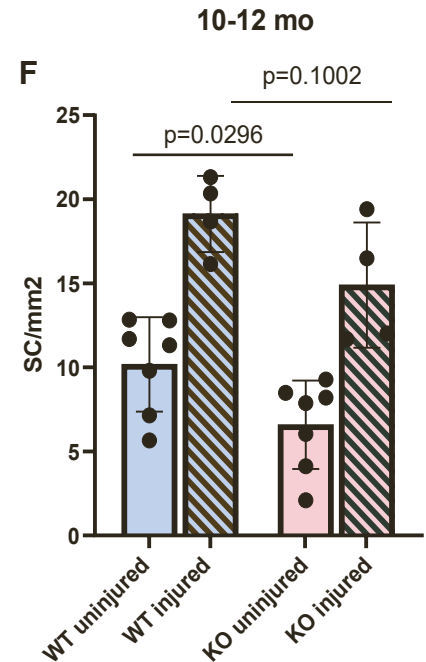

## Supplemental information

### Supplemental Figure Legends

#### **Figure S1: Expression of E3 ubiquitin ligases in MuSCs and Myoblasts, related to Figure 1**

- A. Heatmap representing the significantly differentially expressed E3 ubiquitin ligases between muscle stem cells and primary myoblasts cultured for 3 days. Genes with a base mean count below 100 were removed.
- B. Heatmap representing the Nedd4 E3 ubiquitin ligase family members expression between muscle stem cells and primary myoblasts cultured for 3 days.
- C. Heatmap representing the significantly differentially expressed Nedd4 E3 ubiquitin ligase family members between muscle stem cells and primary myoblasts cultured for 3 days.

#### **Figure S2: Catalytic domain of Nedd4L is deleted in the genetic mouse model, related to Figure 2**

- A. Diagram representing the genetic mouse model where loxp sites are present, surrounding exon 15, generated with Biorender.com. The Cre recombinase is linked to Pax7 expression, resulting in muscle stem cells having exon 15 deleted.
- B. Bar graph representing the absolute expression in RPM from WT and Nedd4L-cKO MuSC RNA-Seq. N = 3; two tailed t-test, data presented as mean  $\pm$  SD.
- C. Heatmap of the top 100 differentially expressed genes between WT and Nedd4L-cKO MuSCs.
- D. Volcano plot of the RNA stability of transcripts between WT and Nedd4L-cKO MuSCs.

#### **Figure S3: Genetic deletion of Nedd4L deregulates important pathways, related to Figure 3**

- A. Bar graph of all of the significantly altered Hallmark pathways between the transcriptome of WT and Nedd4L-cKO MuSCs. Orange bars represent an upregulation in the Nedd4L-cKO; blue bars represent a downregulation.
- B. Heatmaps of the expression of the genes associated with the G2M checkpoint, Myogenesis, and Il6 JAK STAT3 Signaling pathways, in the individual RNA-Seq replicates.

C. Bar graphs of selected representative genes in the G2M Checkpoint, Myogenesis, and Il6 JAK STAT3 Signaling pathways. N = 3; two tailed t-test, data presented as mean  $\pm$  SD.

**Figure S4: Expression of myogenic factors and mKi67 in MuSCs, related to Figure 4**

A. Bar graph of the absolute expression in RPM of Pax7 from the WT and Nedd4L-cKO MuSC RNA-Seq. N = 3; two tailed t-test, data presented as mean  $\pm$  SD.

B. Bar graph of the absolute expression in RPM of Myf5 from the WT and Nedd4L-cKO MuSC RNA-Seq. N = 3; two tailed t-test, data presented as mean  $\pm$  SD.

C. Bar graph of the absolute expression in RPM of MyoD from the WT and Nedd4L-cKO MuSC RNA-Seq. N = 3; two tailed t-test, data presented as mean  $\pm$  SD.

D. Bar graph of the absolute expression in RPM of Myogenin from the WT and Nedd4L-cKO MuSC RNA-Seq. N = 3; two tailed t-test, data presented as mean  $\pm$  SD.

E. Bar graph of the absolute expression in RPM of Myf6 from the WT and Nedd4L-cKO MuSC RNA-Seq. N = 3; two tailed t-test, data presented as mean  $\pm$  SD.

F. Bar graph of the absolute expression in RPM of mki67 from the WT and Nedd4L-cKO MuSC RNA-Seq. N = 3; two tailed t-test, data presented as mean  $\pm$  SD.

G. Representative image of a WT TA cross section stained for PAX7 and Ki67. Scale bar = 40  $\mu$ m.

H. Representative image of a Nedd4L-cKO cross section stained for PAX7 and Ki67. Scale bar = 40  $\mu$ m.

I. Bar graph of the percentage of MuSCs double positive for Ki67 and PAX7. N = 3; two tailed t-test, data presented as mean  $\pm$  SD.

J. Representative images of WT and Nedd4L-cKO TA cross sections, 21 days post CTX induced injury, stained for PAX7 and Ki67. Scale bar = 40  $\mu$ m.

K. Bar graph of the percentage of MuSCs double positive for Ki67 and PAX7 in TA cross sections 21 days post CTX injury. N = 4; two tailed t-test, data presented as mean  $\pm$  SD.

**Figure S5: Nedd4L-cKO MuSCs exhibit characteristics associated with G<sub>al</sub>ert, related to Figure 4**

A. Representative images of EDL associated MuSCs stained for Pax7 and phospho-S6 kinase, 0 hours post isolation. Scale bar = 25  $\mu$ m.

- B. Bar graph of the percentage of phospho-S6 kinase positive MuSCs, 0 hours post isolation. n = 3 mice per condition; two tailed t-test, data presented as mean  $\pm$  SD.
- C. Representative images of EDL associated MuSCs stained for Pax7 and phospho-S6 kinase, 6 hours post isolation. Scale bar = 25  $\mu$ m.
- D. Bar graph of the percentage of phospho-S6 kinase positive MuSCs, 6 hours post isolation. n = 3 mice per condition; two tailed t-test, data presented as mean  $\pm$  SD.
- E. Representative images of EDL associated MuSCs stained for Pax7 and phospho-S6 kinase, 24 hours post isolation. Scale bar = 25  $\mu$ m.
- F. Bar graph of the percentage of high expressing phospho-S6 kinase MuSCs, 24 hours post isolation. n = 3 mice per condition; two tailed t-test, data presented as mean  $\pm$  SD.
- G. Representative images of freshly isolated WT and Nedd4L-cKO MuSCs stained for phospho-S6 kinase. Scale bar = 40  $\mu$ m.
- H. Bar graph quantifying the percentage of high, medium, and low-level phospho-S6 kinase MuSCs. All cells were analyzed under the same imaging conditions and a threshold was established to assign the intensity level of the staining for high, medium, and low phospho-S6 kinase levels. n = 5 mice 2-month-old mice per condition; two way ANOVA, data presented as mean  $\pm$  SD.
- I. Representative images of EDL associated MuSCs stained for Pax7 and MyoD, 0 hours post isolation. Scale bar = 25  $\mu$ m.
- J. Bar graph of the percentage of MyoD+/Pax7+ MuSCs 0 hours post isolation. N = 3; two tailed t-test, data presented as mean  $\pm$  SD.
- K. Representative images of EDL associated MuSCs stained for Pax7 and MyoD, 6 hours post isolation. Scale bar = 25  $\mu$ m.
- L. Bar graph of the percentage of MyoD+/Pax7+ MuSCs 6 hours post isolation. N = 3; two tailed t-test, data presented as mean  $\pm$  SD.
- M. Representative images of EDL associated MuSCs stained for Pax7 and MyoD, 24 hours post isolation. Scale bar = 25  $\mu$ m.
- N. Bar graph of the percentage of MyoD+/Pax7+ MuSCs 24 hours post isolation. N = 3; two tailed t-test, data presented as mean  $\pm$  SD.

**Figure S6: Quiescent and activation genes are deregulated in Nedd4L-cKO MuSCs, related to Figure 5**

A. Bar graph of the CHRDL2 protein levels of WT and Nedd4L-cKO MuSC proteomics. N = 4; two tailed t-test, data presented as mean  $\pm$  SD.

B. Bar graph of the percentage of DCX expressing MuSCs associated to 0 hour post isolated EDL myofibers, from 6-month-old male mice. N = 3; two tailed t-test, data presented as mean  $\pm$  SD.

C. Representative image of freshly isolated EDL myofibers stained for DCX and PAX7 from WT and Nedd4L-cKO 6-month-old mice. Scale bar = 25  $\mu$ m.

D. Representative image of TA cross section from an uninjured WT mouse, stained for DCX and PAX7. Scale bar = 40  $\mu$ m.

E. Representative image of TA cross sections from the contralateral TA of an injured WT mouse, stained for DCX and PAX7. Scale bar = 40  $\mu$ m.

F. Representative image of TA cross sections from the contralateral TA of an injured Nedd4L-cKO mouse, stained for DCX and PAX7. Scale bar = 40  $\mu$ m.

G. Bar graph of the percentage of DCX expressing MuSCs in uninjured TAs and contralateral TAs from injured mice. N = 4; two tailed t-test, data presented as mean  $\pm$  SD.

H. Representative images of TA cross sections from the contralateral TA of an injured WT and Nedd4L-cKO mouse, stained for Ki67 and PAX7. Scale bar = 40  $\mu$ m.

I. Bar graph of the percentage of Ki67 positive MuSCs in the contralateral TAs of an injured WT and Nedd4L-cKO mouse. N = 4; two tailed t-test, data presented as mean  $\pm$  SD.

**Figure S7: Genes that are transcriptionally deregulated in the Nedd4L-cKO MuSCs show no difference in chromatin accessibility, related to Figure 6**

A. IGV tracks of ATAC-Seq peaks from WT and Nedd4L-cKO MuSCs of the NR1D1 gene.

B. IGV tracks of ATAC-Seq peaks from WT and Nedd4L-cKO MuSCs of the CHRDL2 gene.

C. IGV tracks of ATAC-Seq peaks from WT and Nedd4L-cKO MuSCs of the DCX gene.

D. IGV tracks of ATAC-Seq peaks from WT and Nedd4L-cKO MuSCs of the IL6 gene.

E. IGV tracks of ATAC-Seq peaks from WT and Nedd4L-cKO MuSCs of the CCL11 gene.

- F. IGV tracks of ATAC-Seq peaks from WT and Nedd4L-cKO MuSCs of the B2M gene.
- G. IGV tracks of ATAC-Seq peaks from WT and Nedd4L-cKO MuSCs of the MT1 gene.
- H. IGV tracks of ATAC-Seq peaks from WT and Nedd4L-cKO MuSCs of the GAPDH gene. Data is presented as mean  $\pm$  SD.

**Figure S8: Nedd4L-cKO myoblasts have no defect in survival or proliferation, related to Figure 7**

- A. Representative images of EDL myofibers 72 hours post isolation and stained for MyoD and cleaved Caspase3 from WT, Nedd4L-cKO 6-8 weeks old mice. WT myofibers were treated with H<sub>2</sub>O<sub>2</sub> as a positive control. Scale bar = 25 $\mu$ m.
- B. Bar graph of the percentage of cleaved Caspase3 positive MuSCs that were associated to EDL myofibers 72 hours post isolation from WT and Nedd4L-cKO myofibers. WT myofibers were treated with H<sub>2</sub>O<sub>2</sub> as a positive control. N = 3; two tailed t-test, data presented as mean  $\pm$  SD.
- C. Bar graph of the percentage of EDU positive primary myoblasts treated for 12 and 24 hours. N = 3; two tailed t-test, data presented as mean  $\pm$  SD.
- D. Representative images of WT and Nedd4L-cKO primary myoblasts treated with EDU for 12 and 24 hours. Scale bar = 25 $\mu$ m.
- E. Western blot of Nedd4L, Pax7, MyoD and Gapdh as a loading control, from WT and Nedd4L-cKO primary myoblasts.
- F. Western blot of Nedd4L, Pax7, Myogenin, and Gapdh as a loading control, from WT and Nedd4L-cKO myotubes cultured for 5 days in differentiation media. Data is presented as mean  $\pm$  SD.
- G. Representative images of freshly isolated EDL myofibers from WT and Nedd4L-cKO male 12-month-old mice, stained for Pax7.
- H. Bar graph of the number of MuSCs from 0 hour post isolation EDL myofibers from WT and Nedd4L-cKO 12-month-old mice. N = 4 male mice; two tailed t-test, data presented as mean  $\pm$  SD.

**Figure S9: No differences in the ratio of the expression of myogenic factors in EDL associated myofibers are seen between WT and Nedd4L-cKO condition, related to Figure 7**



A. Representative images of EDL associated MuSCs stained for Pax7 and MyoD, 48 hours post isolation. Scale bar = 25  $\mu$ m.

B. Bar graph of the percentage of MuSCs positive for Pax7, MyoD, or double positive for Pax7 and MyoD 48 hours post isolation. N = 3; two way ANOVA, data presented as mean  $\pm$  SD.

C. Representative images of EDL associated MuSCs stained for Myogenin and MyoD, 48 hours post isolation. Scale bar = 25  $\mu$ m.

D. Bar graph of the percentage of MuSCs positive for Myogenin, MyoD, or double positive for Myogenin and MyoD 48 hours post isolation. N = 3; two way ANOVA, data presented as mean  $\pm$  SD

E. Representative images of EDL associated MuSCs stained for Pax7 and MyoD, 72 hours post isolation. Scale bar = 25  $\mu$ m.

F. Bar graph of the percentage of MuSCs positive for Pax7, MyoD, or double positive for Pax7 and MyoD 72 hours post isolation. N = 3; two way ANOVA, data presented as mean  $\pm$  SD

G. Representative images of EDL associated MuSCs stained for Myogenin and MyoD, 72 hours post isolation. Scale bar = 25  $\mu$ m.

H. Bar graph of the percentage of MuSCs positive for Myogenin, MyoD, or double positive for Myogenin and MyoD 72 hours post isolation. N = 3; two way ANOVA, data presented as mean  $\pm$  SD

**Figure S10: Nedd4L-cKO skeletal muscle does not have a regeneration defect, related to Figure 7**

A. Representative image of a TA cross section from 5-week-old WT and Nedd4L-cKO mice. The cross sections were stained for PAX7, Laminin and counterstained with DAPI.

B. Bar graph of the average number of MuSCs per mm<sup>2</sup> from the TA cross sections of 5-week-old WT and Nedd4L-cKO mice. n = 4 mice per condition; two tailed t-test, data presented as mean  $\pm$  SD.

C. Representative image of uninjured and CTX injured TA cross sections from 3-month-old WT and Nedd4L-cKO mice. In the injured condition the TAs were allowed to regenerate for 21 days before the muscle was harvested. The cross sections were stained for PAX7, Laminin and counterstained with DAPI.

D. Bar graph of the average number of MuSCs per mm<sup>2</sup> from the uninjured and injured TA cross sections of 3-month-old WT and Nedd4L-cKO mice. n = 5 mice per condition; two tailed t-test, data presented as mean ± SD.

E. Representative image of uninjured and CTX injured TA cross sections from 10–12-month-old WT and Nedd4L-cKO mice. In the injured condition the TAs were allowed to regenerate for 21 days before the muscle was harvested. The cross sections were stained for PAX7, Laminin and counterstained with DAPI.

F. Bar graph of the average number of MuSCs per mm<sup>2</sup> from the uninjured and injured TA cross sections of 10–12-month-old WT and Nedd4L-cKO mice. n = 4-7 mice per condition; two tailed t-test, data presented as mean ± SD.
